# Supplementary material for: Enhancer methylation dynamics contribute to cancer plasticity and patient mortality
Source: HighWire-hosted journal article supplement (doi:10.1101/gr.197194.115), 2016-02-23
Supplement: Supplemental_Methods.docx [file Supplemental_Methods.docx]

# SUPPLEMENTAL METHODS

***Invasion assay***

5x105 cells were added to invasion chambers (Transwell®, Corning Incorporated) coated with Matrigel (BD Biosciences). Cells were allowed to invade for 10 hours toward media containing 10% fetal bovine serum. Cells remaining on the top side of the membrane were counted and then removed using a cotton swab, and invading cells were fixed and stained with 4′-6-diamidino-2-phenylindole (DAPI, Vector Laboratories Inc.). Images of fixed Transwell membrane from the invasion chamber were taken in Olympus IX81 microscope using the cellSens Dimension software. The number of invaded cells was normalized to the number of total seeded cells.

***Chromatin marks, transcription factors (TFs) and sequence conservation details***

We downloaded ‘broadPeak’ files of RNA polymerase II (POL2), histone modifications H2A.Z, H3K4me1, H3K4me2 and H3K27ac from http://hgdownload.cse.ucsc.edu/goldenPath/hg19/encodeDCC/wgEncodeBroadHistone/, histone acetyltransferase (EP300) and CCCTC-binding factor (CTCF) files from http://hgdownload.cse.ucsc.edu/goldenPath/hg19/encodeDCC/wgEncodeUwTfbs/, and DNase-I hypersensitivity ‘bed’ files from http://hgdownload.cse.ucsc.edu/goldenPath/hg19/encodeDCC/wgEncodeOpenChromSynth/, Chromatin State Segmentation by HMM (ChromHMM) ‘bed’ files from http://hgdownload.cse.ucsc.edu/goldenPath/hg19/encodeDCC/wgEncodeBroadHmm/, and ENCODE Project cell types from https://genome.ucsc.edu/ENCODE/cellTypes.html (Supplemental Table S2).

Transcription factor (TF) processed ChIP-seq data of POU5F1, SOX2, and NANOG was downloaded in ‘bed’ format from NCBI/GEO (record GSE46130; human embryonic stem cells).

Sequence conservation scores of PhastCons 100-way data was downloaded from http://hgdownload.cse.ucsc.edu/gbdb/hg19/multiz100way/.

***Gene and miRNA differential expression analysis***

For each cancer dataset (Supplemental Table S1), we performed a differential expression analysis using the ‘limma’ package for R (version 3.20.9) ([Matthew E Ritchie 2015](#_ENREF_1)). Normal tissue was compared with primary tumor tissue, and primary melanoma were compared to metastatic melanoma. We used a >1.25 cut-off of absolute fold-change (*q*<0.05, FDR corrected).

***Custom R scripts for determining differentially methylation regions, predicting ranked eDMR-gene pairs***

In-house custom R scripts ([R Core Team 2015](#_ENREF_2)) are provided for identifying differentially methylated regions (DMRs) and eDMR-gene pairs; also are included an example dataset and supporting material for this purpose. The following describe scripts and the accompanying material: (A) the folder named ‘R_Scripts’ includes in-house custom R scripts for determining DMRs and for predicting and ranking eDMR-gene pairs. (B) The folder named ‘Example_dataset’ contains sample data, in order to run the custom scripts, these include: a DNA methylation matrix (file name ‘MethMatrix’; Illumina HumanMethylation450 array), and an RNA-seq gene expression matrix (file name ‘ExprMatrix’). Both were downloaded from The Cancer Genome Atlas (TCGA) and include normal kidney samples and primary tumor biopsies from patients with kidney papillary carcinoma (KIRP). The resultant output of the custom scripts include the eDMR-gene pair predictions (file named ‘predictions_eDMR_gene_xxx_pairs.txt’), which are ranked based on the scoring method (see Methods) and using the example dataset provided. (C) The folder named ‘Chromatin_RData’ includes ChIP-seq data of the chromatin marks: DNase I hypersensitivity sites, H2A.Z, H3K4me1 and H3K4me1 peaks, which are used to assess chromatin marks on enhancers and promoters, when predicting the eDMR-gene pairs. These data were obtained from the ENCODE Project (see Supplemental Table S2 for details). (D) The folder named ‘Annotation_files’ includes ‘.RData’ files, which are used to convert the CpG level DNA methylation data (file ‘MethMatrix’) to region-wise methylation data, and are saved to interim output files named “XXX_MeanMatrix.txt” for each genomic feature. The “XXX_DiffMeth_Table.txt” files are the output after determining the differentially methylated regions (DMRs) for each genomic feature. These output files are based on an example dataset provided in the Supplemental data. See the file INFO_README.txt for instructions on running the R scripts provided in the Supplemental data.

**SUPPLEMENTAL REFERENCES**

Matthew E Ritchie BP, Di Wu, Yifang Hu, Charity W Law, Wei Shi , Gordon K Smyth. 2015. limma powers differential expression analyses for {RNA}-sequencing and microarray studies. *Nucleic Acids Research* **43**(7): e47.

R Core Team. 2015. R: A Language and Environment for Statistical Computing. *R Foundation for Statistical Computing*.
